# Supplementary material for: Prolonged starvation drives reversible sequestration of lipid biosynthetic enzymes and organelle reorganization in Saccharomyces cerevisiae
Source: PubMed Central journal article supplement — Mol Biol Cell. 2015 May 1;26(9):1601–15. doi: 10.1091/mbc.E14-11-1559 (PMC4436773; doi:10.1091/mbc.e14-11-1559), 2015-05-01
Supplement: supp_E14-11-1559v1_CombinedSupMats.pdf [file supp_E14-11-1559v1_CombinedSupMats.pdf]

# Supplemental Materials

*Molecular Biology of the Cell*

Suresh et al.

# Supplemental Figure 1:

**A**

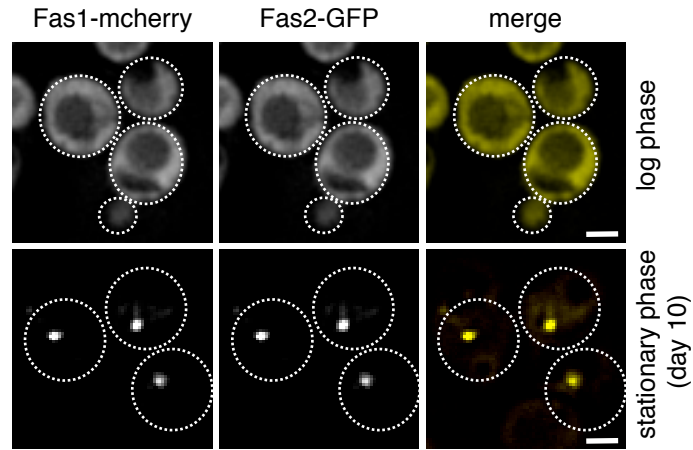

**B**

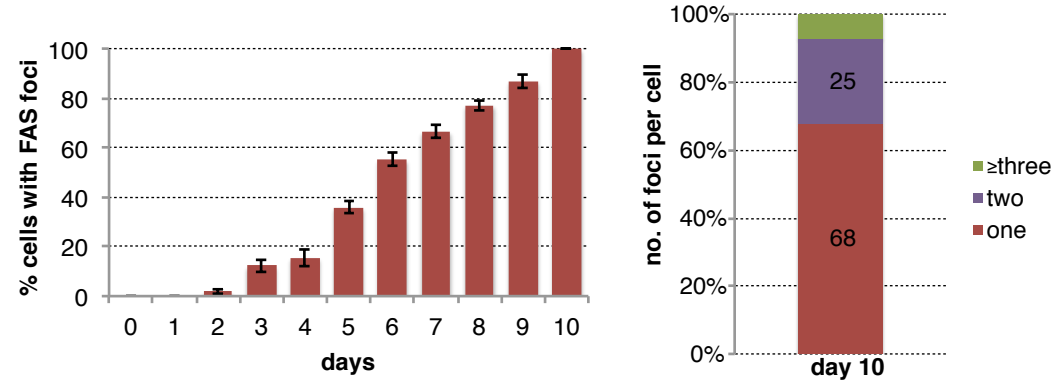

**C**

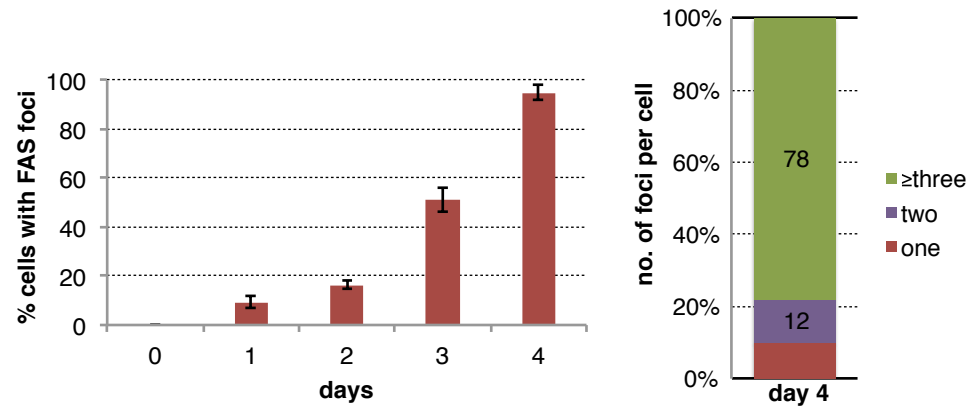

**D**

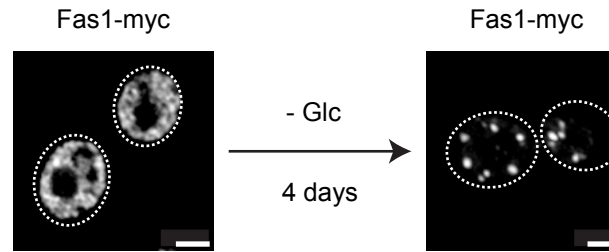

## Supplementary Figure 2:

A

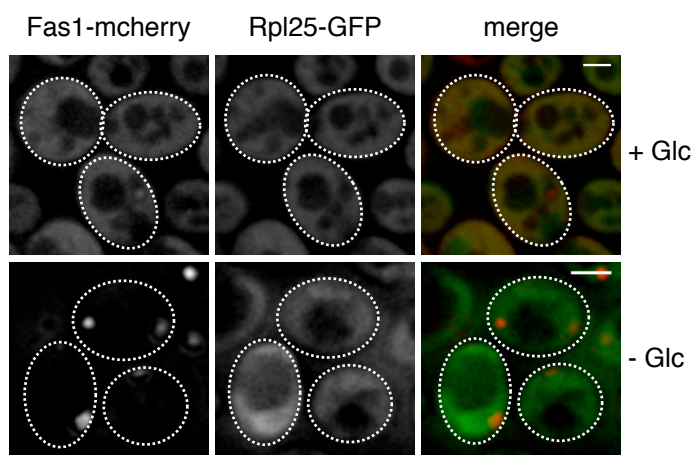

B

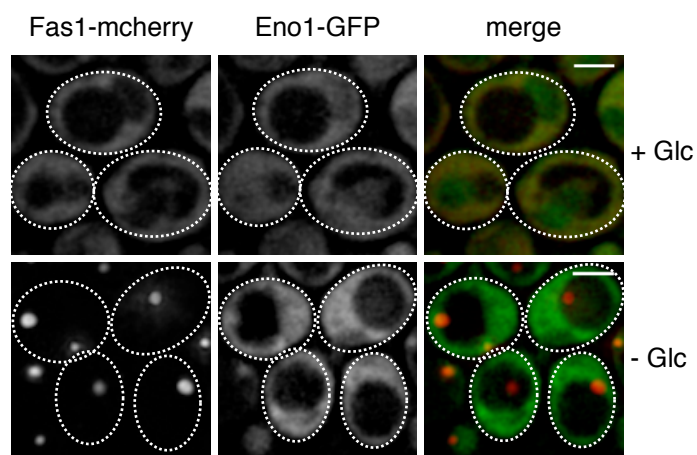

C

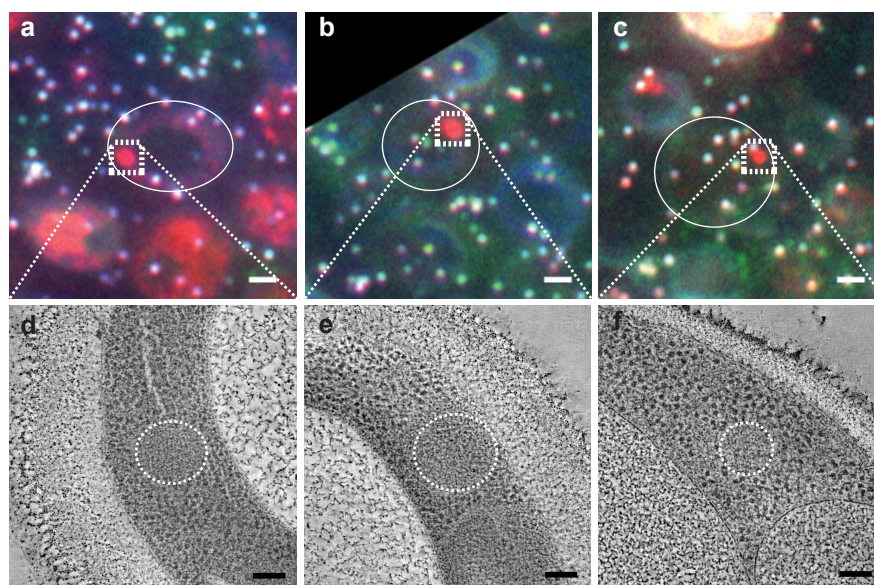

D

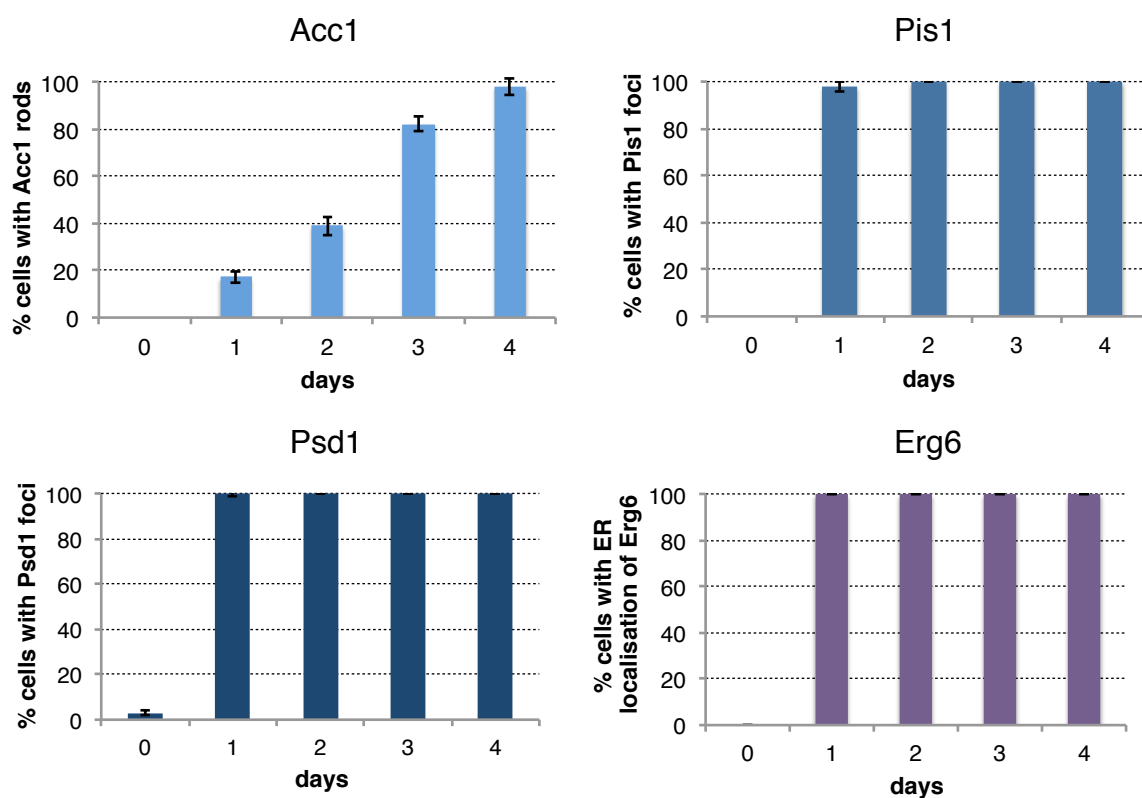



## Supplementary Figure 4:

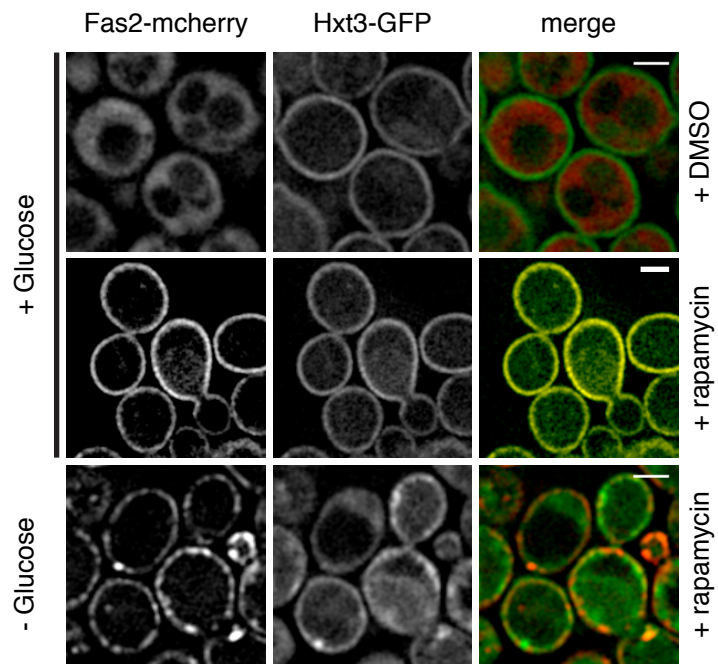

## Supplementary Figure 5:

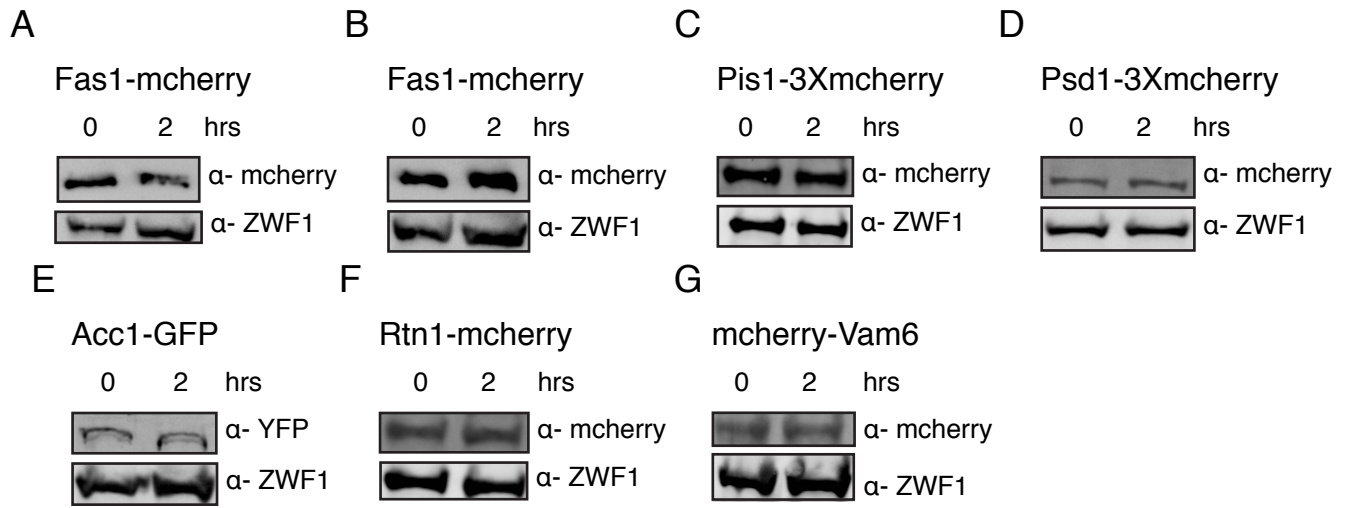

**Supplementary Figure 6:**

**A**

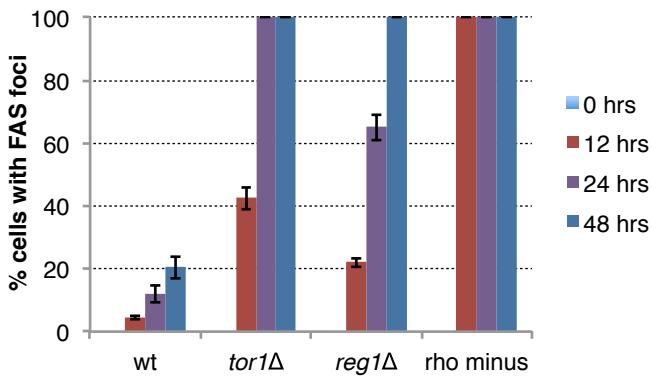

**B**

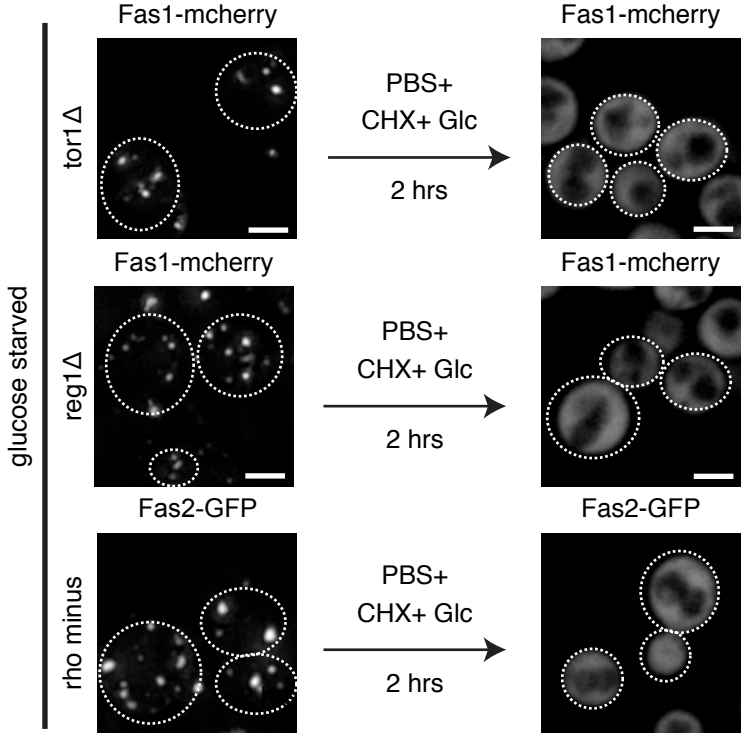

### Supplementary Figure 7:

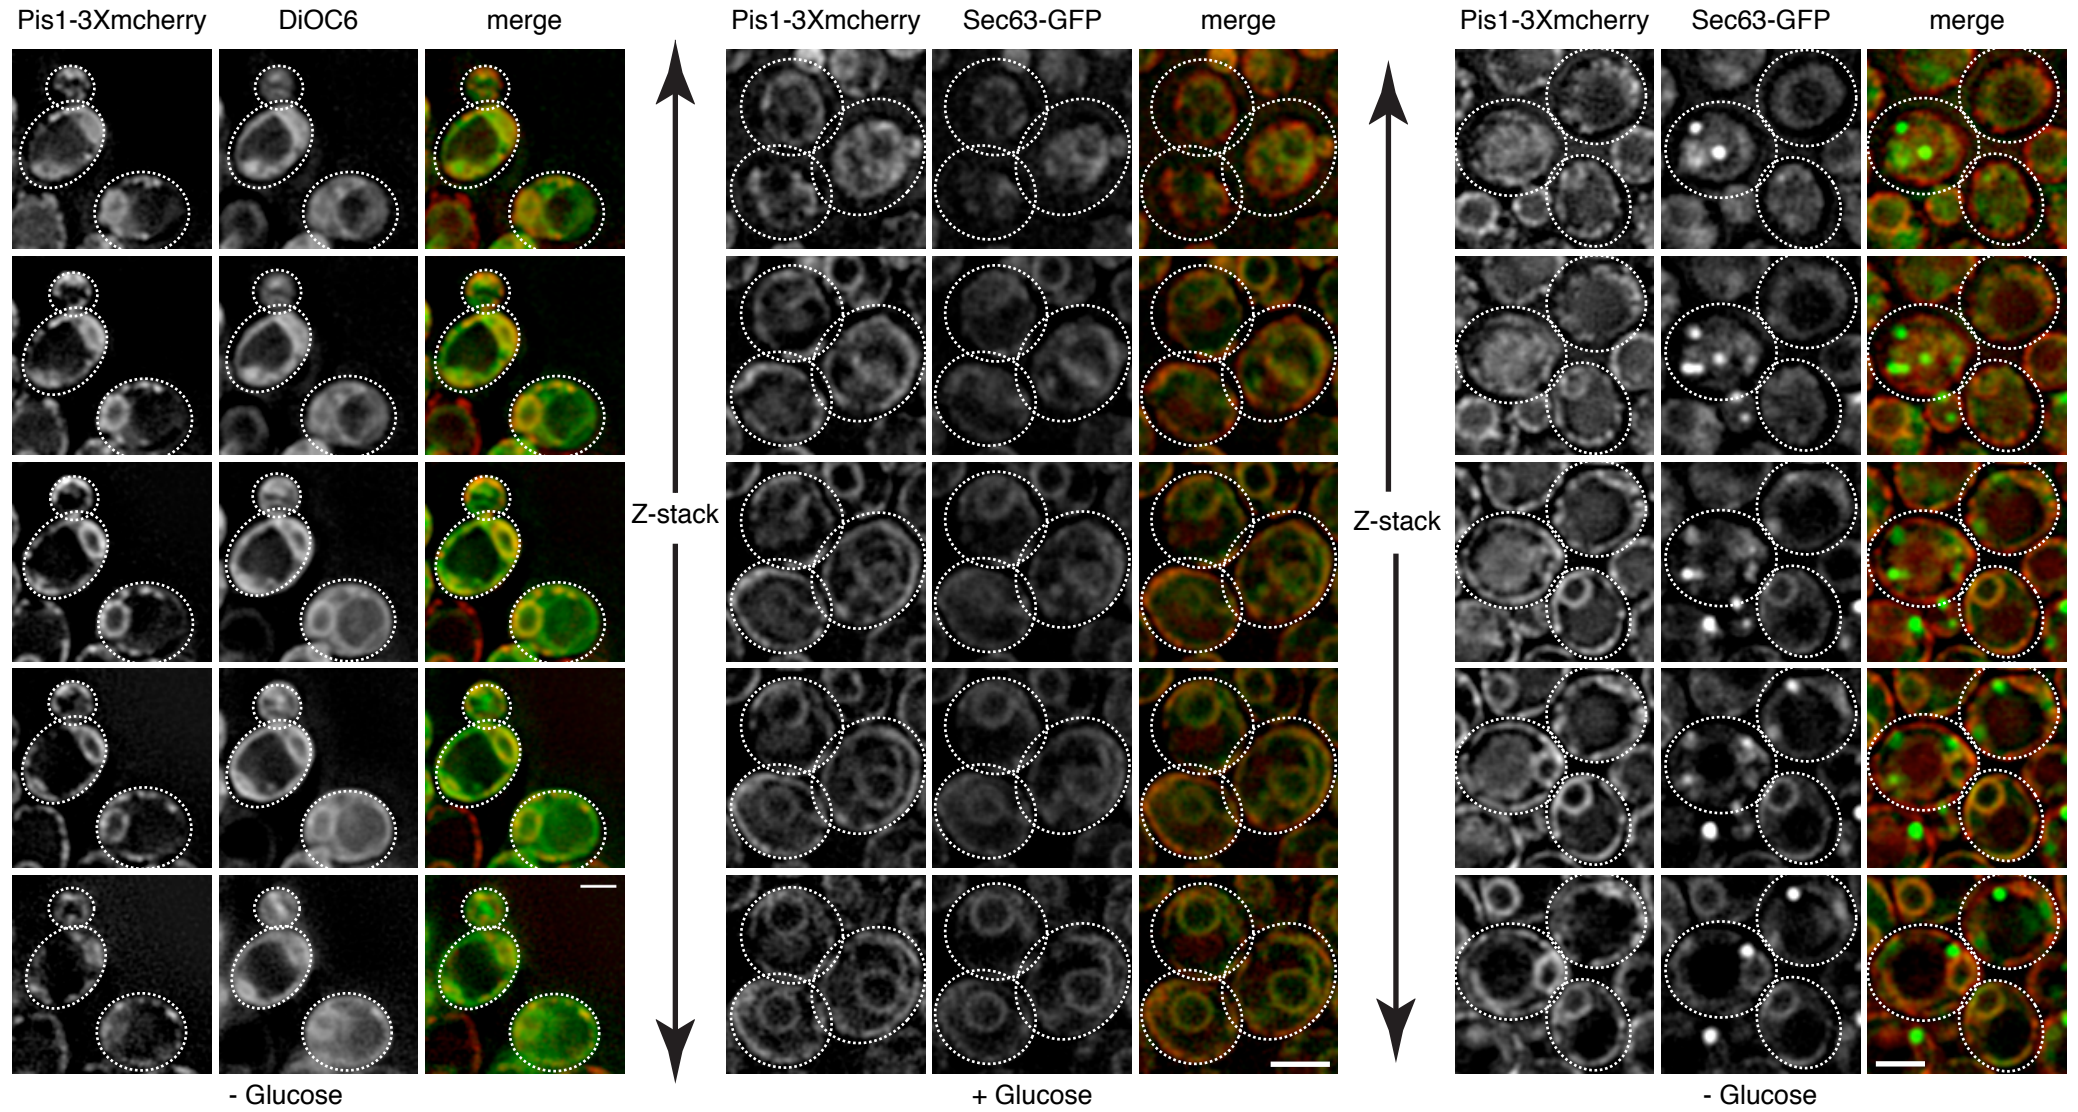



# Supplementary Figure 8:

A

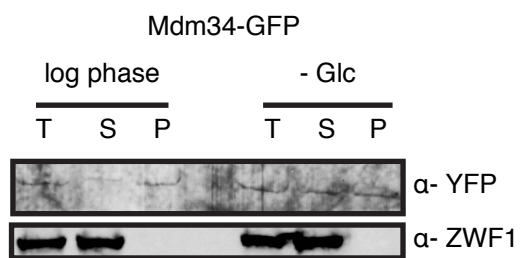

B

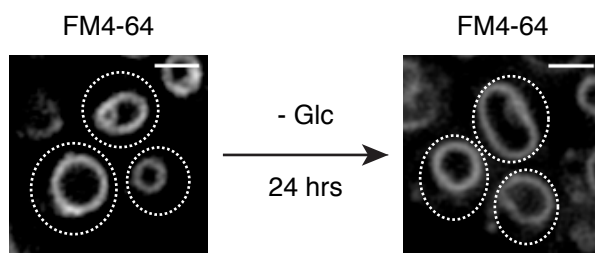

C

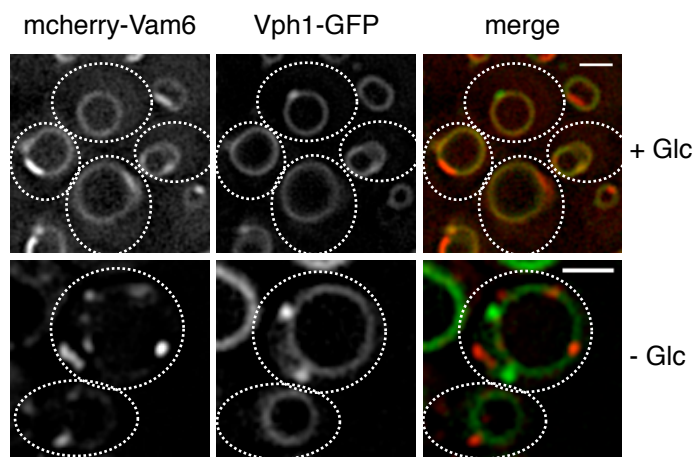

**Supplementary information: (Suresh *et.al*, 2015)**

**Supplementary Figure 1:** Kinetics of sequestration of lipid biosynthetic enzymes upon starvation (corresponding to Figure 1). (A) Both subunits of FAS co-sequester into foci that co-localize in stationary phase cells. *S. cerevisiae* cells expressing Fas1-mcherry and Fas2-GFP were grown to log phase or stationary phase (10 days) at 30°C. Changes in protein localizations were recorded. Dashed lines indicate cell boundaries. Single Z-plane images are shown. Bars: 2 µm. (B/C) Time dependent changes in the percentage number of cells harboring FAS foci in cells grown to late stationary phase or upon glucose depletion at 30°C. Percentage of cells having FAS foci (left panel) and the distribution of number of Fas1-mcherry foci per cell (right panel) in stationary phase cells (B) or glucose depleted cells (C) in SD medium at were determined two times (n=100 each). (D) Fas1 accumulates into foci upon glucose depletion. Fas1-7xmyc tagged cells were either grown to log phase or glucose starved for 4 d and localization of Fas1 was probed by immunofluorescence using anti-myc antibody. Maximum intensity projections of Z-stack images are shown. Scale bar: 2 µm.

**Supplementary Figure 2:** (A/B) Glucose starvation leads to sequestration of specific cytosolic cellular factors. *S.cerevisiae* cells were grown to log phase and starved of glucose for 4 days. Fas1-mcherry/Fas2-mcherry but not other tested cytosolic factors, Rpl25-GFP/Eno1-GFP, sequestered into foci upon glucose starvation. Single plane images are shown. Scale bar: 2 µm. (C) Correlated fluorescence and electron microscopic analysis of Fas1-mcherry foci formed upon glucose depletion. (a-c) An overlay of GFP, mcherry and blue fluorescence channels

to visualize Fas1-mCherry spots as well as fiducial markers, which are visible in all three channels and therefore appear white. Circles mark the boundaries of the cells and the foci are marked by dashed squares. (d-e) are close-up views of virtual slices through the electron tomograms, corresponding approximately to the boxed areas in (a-c), respectively. The predicted centroid positions of the mcherry signals are marked by the center of the white dashed curves. Scale bars: 1  $\mu\text{m}$  in (a-c) and 100 nm in (d-f). (D) Cells expressing *Acc1-GFP/Pis1-3Xmcherry/Psd1-3Xmcherry/Erg6-mcherry* were grown to log phase in SD medium. Cells were washed twice with water and glucose depleted by transferring them to fresh SC medium. Cells were monitored for foci formation on different days by fluorescence microscopy. Time dependent sequestration of different proteins was quantified from multiple repetitions (n=100 cells). Standard deviations are given.

**Supplementary Figure 3:** FAS foci unlike misfolded protein aggregates do not co-localize with other known sequestrations during starvation (corresponding to Figure 2). (A) FAS is sequestered at a site distinct from other known sequestrations. *S. cerevisiae* cells coexpressing *Fas1-mcherry/Fas1-GFP* with *Ura7-GFP*, *Gln1-mcherry*, *Ade4-GFP* or *Pre6-GFP* were grown to stationary phase in SD medium for 10 days. Localizations of protein fusions were determined by fluorescence microscopy (n=100/each pair). Single Z-plane images are shown. Bars: 2  $\mu\text{m}$ . (B) Proteins sequester at different rates in stationary phase. Cells expressing *Ura7-GFP/Gln1-mcherry/Ade4-GFP /Pre6-GFP* were grown to stationary phase in SD medium. Time dependent changes in the percentage no. of cells harboring foci for the above-mentioned proteins were determined. The experiments were repeated twice based on 100 cells and standard deviations are given.

**Supplementary Figure 4:** Glucose starvation leads to alterations in distribution of plasma membrane proteins. *S.cerevisiae* cells expressing Fas1-FRB, Pma1-FKBP12, Fas2-mcherry and Hxt3-GFP were grown to log phase. While an aliquot of the culture was treated with either DMSO (control) or rapamycin (upper panel), another aliquot was treated with rapamycin and starved of glucose for a day (lower panel). In the log phase culture, addition of rapamycin leads to anchoring of FAS (monitored by Fas2-mcherry) uniformly to the plasma membrane, stained by Hxt3-GFP (upper panel). In glucose-starved cells, Fas2-mcherry while anchored to the plasma membrane accumulates into punctate structures that are largely distinct from those formed by Hxt3-GFP (lower panel). Scale bar: 2  $\mu$ m.

**Supplementary Figure 5:** Protein levels of sequestered proteins do not change upon addition of glucose and cycloheximide. *S.cerevisiae* cells expressing fluorescent protein tagged marker proteins (Fas1-mcherry/Acc1-GFP/Pis1-3Xmcherry/Psd1-3Xmcherry/Rtn1-mcherry/mcherry-Vam6) were grown to log phase and starved of glucose. Foci formation of the above mentioned markers were confirmed by fluorescence microscopy. 2% (v/v) Glucose (A, C-G) or entire medium (B) was added to cycloheximide (100  $\mu$ g/ml) treated cells and incubated for 2 h at 30°C. Total cell lysates were prepared and protein levels were determined before and after glucose addition using anti-YFP/anti-mcherry antibodies. Anti-ZWF1 antibodies were used for loading controls.

**Supplementary Figure 6:** FAS sequestration is modulated by nutrient sensing pathways and is independent of its subcellular localization (corresponding to Figure 2). (A) *S.cerevisiae* wt, *tor1Δ*, *reg1Δ* and rho minus cells expressing Fas1-mcherry/Fas2-GFP were grown to log phase and subsequently starved of glucose by transferring them to media lacking glucose. Changes in localization of FAS monitored by fluorescence microscopy at different time points and their kinetics were determined (n=100). Standard deviations are given (n=2). (B) FAS foci formed in nutrient sensing mutants are reversible. Glucose starved *tor1Δ*, *reg1Δ* and rho minus cells expressing Fas1-mcherry/Fas2-GFP were replenished with glucose in the presence of cycloheximide (100 μg/ml) and changes in localization monitored by fluorescence microscopy. Images represent maximum intensity projections of the Z-stack images. Bars: 2 μm.

**Supplementary Figure 7:** Glucose starvation drives sequestration of ER proteins into distinct foci. Left panel: *S. cerevisiae* cells expressing Pis1-3Xmcherry were grown to log phase and starved of glucose for 1 day. The ER was stained by DiOC6 (5 ng/ml) and imaged by fluorescence microscopy. While the peripheral Pis1-3Xmcherry accumulates into foci, the ER membrane staining remains continuously uniform. Middle and right panel: *S. cerevisiae* cells expressing Pis1-3Xmcherry and Sec63-GFP were grown to log phase and/or starved of glucose for 1 day. Sec63-GFP and Pis1-3Xmcherry accumulate into distinct foci upon glucose starvation (right panel). Scale bar: 2 μm.

**Supplementary Figure 8:** Glucose starvation causes re-localization of ERMES and vCLAMP markers. (A) *S. cerevisiae* cells expressing Mdm34-GFP were grown at

30°C to either log phase or were depleted of glucose for one day. Total cell lysates (T) were separated into soluble/cytosolic (S) and insoluble/organelle (P) fractions by centrifugation. Distribution of Mdm34-GFP was determined by western blot analysis using GFP-specific antibodies. (B) *S.cerevisiae* cells were either grown to log phase or starved of glucose for one day and vacuoles were stained with FM4-64. (C) *S.cerevisiae* cells expressing mcherry-Vam6 and Vph1-GFP were either grown to log phase or starved of glucose for one day. mcherry-Vam6 and Vph1-GFP colocalize to the vacuolar membrane in log phase cultures (upper panel). Glucose starvation leads to sequestration of mcherry-Vam6 into distinct puncta without affecting Vph1-GFP vacuolar membrane localization (lower panel). Scale bar: 2 µm.

**Supplementary Table 1:** Alterations in lipid profiles upon glucose starvation (corresponding to Figure 8). Relative levels of different phospholipid species measured for 10 biological replicates at different time points of glucose starvation.

|       |         | % of total |         |         |         |
|-------|---------|------------|---------|---------|---------|
|       | Time(h) | PC         | PE      | PI      | PS      |
| EXP01 | 0h      | 39,5347    | 25,6417 | 15,8809 | 18,9427 |
| EXP01 | 0h      | 41,893     | 25,7552 | 15,0387 | 17,3131 |
| EXP01 | 0h      | 37,2324    | 25,8011 | 18,4714 | 18,4952 |
| EXP03 | 0h      | 50,5319    | 30,5214 | 6,1925  | 12,7542 |
| EXP03 | 0h      | 49,692     | 31,2266 | 6,39497 | 12,6864 |
| EXP03 | 0h      | 46,7757    | 23,2329 | 17,0016 | 12,9898 |
| EXP05 | 0h      | 52,252     | 23,286  | 5,00446 | 19,4575 |
| EXP05 | 0h      | 51,6425    | 23,2192 | 5,40399 | 19,7343 |
| EXP05 | 0h      | 50,1223    | 23,2778 | 5,58068 | 21,0192 |
| EXP05 | 0h      | 50,786     | 23,2553 | 5,43558 | 20,5231 |
| EXP01 | 24h     | 44,7142    | 20,2868 | 18,3102 | 16,6889 |
| EXP01 | 24h     | 42,0035    | 22,2782 | 22,7559 | 12,9624 |
| EXP01 | 24h     | 37,1858    | 18,5369 | 30,6102 | 13,6671 |
| EXP03 | 24h     | 47,7375    | 20,6492 | 19,3377 | 12,2756 |
| EXP03 | 24h     | 44,5014    | 22,921  | 19,8501 | 12,7275 |
| EXP03 | 24h     | 43,6936    | 23,3431 | 21,2054 | 11,7579 |
| EXP05 | 24h     | 49,0948    | 12,5944 | 18,7367 | 19,574  |
| EXP05 | 24h     | 49,0283    | 12,0925 | 18,6842 | 20,195  |
| EXP05 | 24h     | 48,1188    | 12,0094 | 19,7969 | 20,075  |
| EXP05 | 24h     | 48,6435    | 12,7889 | 19,6229 | 18,9447 |
| EXP01 | 48h     | 42,0636    | 25,5254 | 19,0981 | 13,3129 |
| EXP01 | 48h     | 38,5178    | 21,1545 | 25,1437 | 15,184  |
| EXP01 | 48h     | 41,977     | 20,1174 | 19,3543 | 18,5513 |
| EXP03 | 48h     | 42,911     | 22,0559 | 20,2374 | 14,7958 |
| EXP03 | 48h     | 40,5843    | 25,4525 | 20,1956 | 13,7676 |
| EXP03 | 48h     | 40,0512    | 24,8678 | 21,8527 | 13,2284 |
| EXP05 | 48h     | 45,8385    | 13,4051 | 20,3142 | 20,4422 |
| EXP05 | 48h     | 45,0753    | 13,0205 | 19,6307 | 22,2735 |
| EXP05 | 48h     | 47,5523    | 12,938  | 19,5203 | 19,9895 |
| EXP05 | 48h     | 47,2074    | 13,1913 | 19,751  | 19,8503 |
| EXP01 | 72h     | 36,7845    | 19,4802 | 27,1497 | 16,5856 |
| EXP01 | 72h     | 40,3456    | 21,6106 | 22,8464 | 15,1975 |
| EXP01 | 72h     | 38,1057    | 23,3527 | 25,1849 | 13,3567 |
| EXP03 | 72h     | 38,5634    | 26,386  | 20,0647 | 14,9858 |
| EXP03 | 72h     | 38,7548    | 25,5098 | 20,9233 | 14,8121 |
| EXP03 | 72h     | 36,7598    | 26,9457 | 20,9953 | 15,2991 |

|       |                              |                 |                 |                 |                 |
|-------|------------------------------|-----------------|-----------------|-----------------|-----------------|
| EXP05 | 72h                          | 43,7002         | 13,9781         | 20,1328         | 22,1889         |
| EXP05 | 72h                          | 42,6137         | 13,3654         | 20,9161         | 23,1048         |
| EXP05 | 72h                          | 42,4945         | 13,9151         | 21,3113         | 22,2791         |
| EXP05 | 72h                          | 44,3804         | 13,6239         | 19,3993         | 22,5963         |
| EXP01 | 96h                          | 42,4311         | 15,5031         | 22,9527         | 19,1131         |
| EXP01 | 96h                          | 42,1351         | 16,584          | 20,6042         | 20,6767         |
| EXP01 | 96h                          | 42,7748         | 15,5146         | 22,9525         | 18,7581         |
| EXP03 | 96h                          | 39,6699         | 25,524          | 19,9299         | 14,8762         |
| EXP03 | 96h                          | 37,8194         | 23,9275         | 24,8931         | 13,36           |
| EXP03 | 96h                          | 38,2666         | 26,9496         | 21,3219         | 13,462          |
| EXP05 | 96h                          | 41,049          | 14,3718         | 19,7552         | 24,8241         |
| EXP05 | 96h                          | 41,9615         | 13,9249         | 20,876          | 23,2375         |
| EXP05 | 96h                          | 42,5337         | 13,7842         | 20,8599         | 22,8221         |
| EXP05 | 96h                          | 42,0385         | 14,0423         | 20,9655         | 22,9537         |
|       |                              |                 |                 |                 |                 |
|       | <b>Time(h)</b>               | <b>Total_PC</b> | <b>Total_PE</b> | <b>Total_PI</b> | <b>Total_PS</b> |
| Mean  | 0h                           | 47,0463         | 25,5217         | 10,0405         | 17,3916         |
| Mean  | 24h                          | 45,4721         | 17,75           | 20,891          | 15,8868         |
| Mean  | 48h                          | 43,1778         | 19,1728         | 20,5098         | 17,1395         |
| Mean  | 72h                          | 40,2503         | 19,8168         | 21,8924         | 18,0406         |
| Mean  | 96h                          | 41,068          | 18,0126         | 21,5111         | 19,4083         |
| SD    | 0h                           | 5,47912         | 3,04412         | 5,72209         | 3,32285         |
| SD    | 24h                          | 3,84908         | 4,83208         | 3,65927         | 3,54714         |
| SD    | 48h                          | 3,10959         | 5,48861         | 1,79949         | 3,42144         |
| SD    | 72h                          | 2,85711         | 5,68734         | 2,47379         | 3,95789         |
| SD    | 96h                          | 1,83044         | 5,2648          | 1,60418         | 4,25332         |
| ttest | <b>t-Test versus Time 0h</b> |                 |                 |                 |                 |
| ttest | 24h                          | 0,46683         | 0,00043         | 0,00008         | 0,34055         |
| ttest | 48h                          | 0,06799         | 0,00497         | 0,00003         | 0,86917         |
| ttest | 72h                          | 0,00269         | 0,01192         | 0,00001         | 0,69592         |
| ttest | 96h                          | 0,00423         | 0,00104         | 0,00001         | 0,25273         |

PC: Phosphatidyl choline; PE: Phosphatidyl ethanolamine; PS: Phosphatidyl serine; PI: Phosphatidyl inositol. While the legends for the mean values and the respective standard deviations for 10 biological repeats are highlighted in yellow, the significant P values (as determined by t-test) are highlighted in pink.



**Supplementary Table 2:** Yeast strains used in this study.

| <b>Strain</b> | <b>Genotype</b>                                                                              | <b>Source</b>  |
|---------------|----------------------------------------------------------------------------------------------|----------------|
| BY4741        | MATa his3Δ0;leu2Δ0;met15Δ0;ura3Δ0                                                            | Lab collection |
| BY4742        | MATα his3Δ1;leu2Δ0;lys2Δ0;ura3Δ0                                                             | Lab collection |
| GSHY210       | Fas1-mcherry:: kanMX4;Fas2-GFP::hphNT1                                                       | This study     |
| GSHY185       | BY4742 Fas1-mcherry::kanMX4;Hsp104-GFP::hphNT1                                               | This study     |
| GSHY191       | BY4742 Fas1-mcherry:: kanMX4                                                                 | This study     |
| GSHY97        | BY4741 Fas1-GFP::kanMX4;hsp104Δ::natNT1                                                      | This study     |
| GSHY182       | BY4741 Acc1-GFP::His3;Fas1-mcherry::hphNT1                                                   | This study     |
| GSHY621       | BY4742 Fas2-GFP::kanMX4;Pis1-3Xmcherry::hphNT1                                               | This study     |
| GSHY619       | BY4742 Fas2-GFP::kanMX4;Psd1-3Xmcherry::hphNT1                                               | This study     |
| GSHY479       | BY4742 Erg6-GFP::hphNT1;Fas1-mcherry::kanMX4                                                 | This study     |
| GSHY604       | BY4742 Sec63-3Xmcherry::hphNT1                                                               | This study     |
| GSHY583       | BY4742 ss-dsRed-HDEL::natNT1                                                                 | This study     |
| GSHY514       | BY4741 Shm1-GFP::His3                                                                        | GFP library    |
| GSHY642       | BY4741 Mdm34-GFP::His3                                                                       | GFP library    |
| GSHY639       | BY4742 Fas2-GFP::kanMX4;Psd1-3Xmcherry::hphNT1;<br>rho <sup>-</sup>                          | This study     |
| GSHY409       | HY110 Fas1-FRB-GFP::His3MX6;Fas2-mcherry::hphNT1                                             | This study     |
| HY110         | leu2-3,112;his3-11,15;trp1-1;can1-100;ade2-1;ura3-1;tor1-1;fpr1 Δ:: nat;PMA1-2XFKBP12:: Trp1 | Euroscarf      |
| GSHY408       | HY110 Fas1-FRB::His3MX6;Fas2-mcherry::hphNT1                                                 | This study     |
| GSHY154       | BY4742 Ura7-GFP::hphNT1;Fas1-mcherry::kanMX4                                                 | This study     |
| GSHY126       | BY4741 Fas1-GFP::kanMX4;Gln1-mcherry::hphNT1                                                 | This study     |
| GSHY164       | BY4742 Ade4-GFP::hphNT1;Fas1-mcherry::kanMX4                                                 | This study     |
| GSHY636       | BY4742 Pre6-GFP::hphNT1;Fas1-mcherry::natNT2                                                 | This study     |

|         |                                                                    |                      |
|---------|--------------------------------------------------------------------|----------------------|
| GSHY637 | BY4742 Fas1-7xmyc::natNT2                                          | This study           |
| GSHY634 | YND53 TEF1-mcherry-Vam6::Ura                                       | This study           |
| SSY412  | W303 Sec63-GFP::His3; Rtn1-mcherry::Trp1                           | Schuck<br>laboratory |
| GSHY638 | BY4742 Fas2-GFP::kanMX4;Psd1-3Xmcherry::hphNT1;<br>dnm1Δ::natNT2   | This study           |
| GSHY208 | BY4741 Fas2-GFP::hphNT1; reg1Δ::loxP                               | This study           |
| GSHY547 | BY4742 Fas1-mcherry::hphNT1; tor1Δ::natNT2                         | This study           |
| GSHY637 | YND53 TEF1-mcherry-Vam6:: Ura; Vph1-GFP::hphNT1                    | This study           |
| GSHY643 | HY110 Fas1-FRB::His3MX6, Fas2-mcherry::hphNT1,<br>Eno1-GFP::KanMX4 | This study           |
| GSHY644 | HY110 Fas1-FRB::His3MX6, Fas2-mcherry::hphNT1,<br>Hxt3-GFP::KanMX4 | This study           |
| GSHY645 | BY4742 Pis1-3Xmcherry::hphNT1, Sec63-GFP::His3                     | This study           |
| GSHY294 | BY4742 Rpl25-GFP:: leu Rpl25Δ::Nat, Fas1-<br>mcherry::kanMX4       | This study           |

**Supplementary Table 3: Plasmids used in this study**

| <b>Name of plasmid</b> | <b>Description</b> | <b>Source</b>                            |
|------------------------|--------------------|------------------------------------------|
| pKT127                 | Amp;kan            | Euroscarf                                |
| pBS34                  | Amp; kan           | Yeast resource centre                    |
| pBS35                  | Amp; hph           | Yeast resource centre                    |
| pYM25                  | Amp; hph           | Euroscarf (Janke <i>et.al</i> , 2004)    |
| pYM21                  | Amp; nat           | Euroscarf (Janke <i>et.al</i> , 2004)    |
| pYM27                  | Amp; kan           | Euroscarf (Janke <i>et.al</i> , 2004)    |
| pFA6a-natNT2           | Amp; nat           | Euroscarf (Janke <i>et.al</i> , 2004)    |
| pFA6a-FRB-His3MX6      | Amp; His3          | Euroscarf (Hirohito <i>et.al</i> , 2008) |
| pFA6a-FRB-GFP-His3MX6  | Amp; His3          | Euroscarf (Hirohito <i>et.al</i> , 2008) |
| pMaM57                 | Amp; hph           | Knop laboratory                          |
| pMaM56                 | Amp; nat           | Knop laboratory                          |
| YIplac-dsRedHDEL       | Amp; nat           | Schuck laboratory                        |
| pMaM144                | Amp; hph           | Knop laboratory                          |
| pMaM172                | Amp; Ura3          | Knop laboratory                          |
